# Supplementary material for: Efficient and microbial communities for pollutant removal in a distributed-inflow biological reactor (DBR) for treating piggery wastewater
Source: Royal Society of Chemistry journal article supplement (doi:10.1039/c6ra20777d), 2016-01-01
Supplement: c6ra20777d1.pdf [file c6ra20777d1.pdf]

**Efficiency and microbial communities related to pollutant removal in  
a distributional-inflow biological reactor (DBR) treating piggery  
wastewater**

Zhenxing Zhong, Xiaohui Wu, Lan Gao, Xiejuan Lu, Beiping Zhang\*

*School of Environmental Sciences and Engineering, Huazhong University of Science  
and Technology, Wuhan 430074, China*

\* Corresponding author: Tel./fax: +86 2787792155;

E-mail addresses: [probpzhang@126.com](mailto:probpzhang@126.com) (Prof. Beiping zhang)

**Supplementary Material**

**Appendix A**

**Fig. S1** Variations of nitrogen, organic, DO, pH and ORP during one typical cycle of  
DBR-1(A) and DBR-2 (B) in SET 3(x=0.3);

## Appendix A

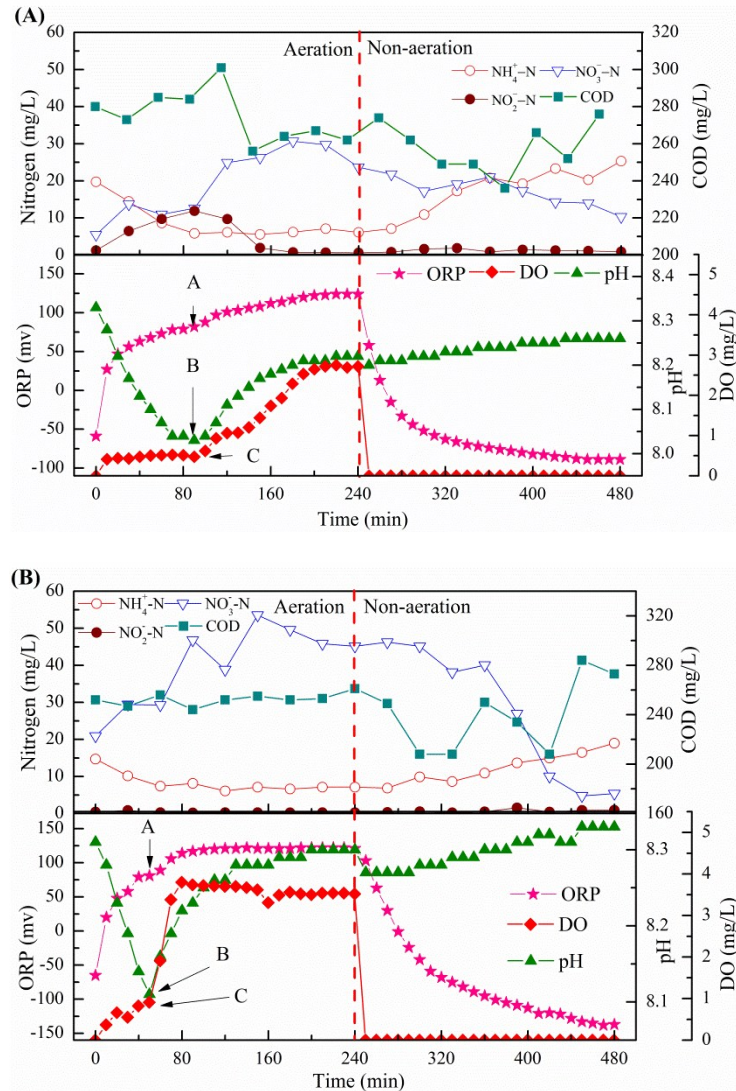

**Fig. S1** Variations of nitrogen, organic, DO, pH and ORP during one typical cycle of DBR-1(A) and DBR-2 (B) in SET 3( $x=0.3$ ); A: ORP break point, B: Ammonia valley point, C: DO break point;
